# Supplementary material
Source: PubMed Central journal article supplement (PMC2932661)
Supplement: NIHMS223349-supplement-1.pdf [file NIHMS223349-supplement-1.pdf]

Supplementary information for

Pias3-dependent SUMOylation controls mammalian cone photoreceptor differentiation.

Akishi Onishi, Guang-Hua Peng, Shiming Chen, and Seth Blackshaw

**Supplementary Figures:**

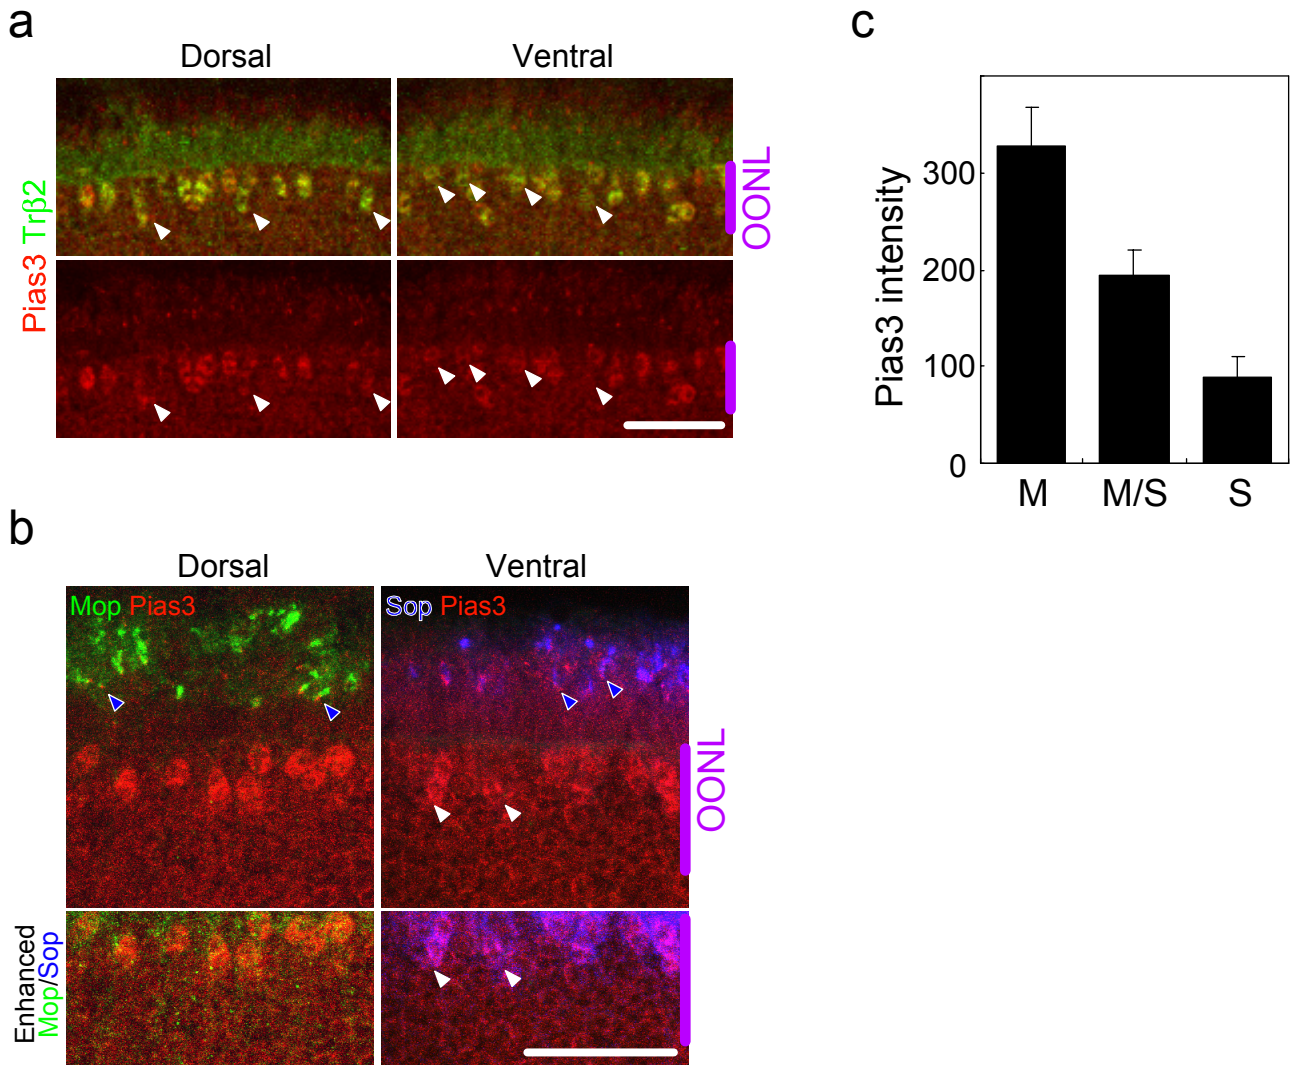

**Supplementary Figure 1.** Section and flat mount immunohistochemistry (IHC) analysis of Pias3 in 8wk C57BL/6 mouse retinas. (a and b) Section IHC of dorsal and ventral retinas immunostained with Pias3 (red) and Trβ2 (green) (a) and with Sop (blue)/Mop (green) and Pias3 (red) (b). Pias3 signals in cone photoreceptor nuclei were double-labeled with Trβ2, Mop or Sop. A subset of cone photoreceptor

nuclei label relatively weakly with the anti-Pias3 antibody (white arrowheads). These nuclei are preferentially labeled with Sops (b, white arrowheads), indicating that S-dominant cones express less Pias3 than M-dominant cones. Pias3 is also expressed in the inner segment of cone photoreceptors, in a position corresponding to the connecting cilium (blue arrowheads). In the lower panels of Figure S1b, the exposure time is increased to enable S- and M-cone opsin immunostaining to be detected in cone photoreceptor cell bodies. Scale bar: 10  $\mu\text{m}$ . (c) Quantification of nuclear Pias3 immunofluorescence of each cone subtype (M, M/S and S) from confocal Z projections obtained from flat mount immunohistochemistry data shown in Figure 1a. All data are represented as mean  $\pm$  s.d. ( $n = 6$  cells of each type). The immunofluorescence intensity of nuclear Pias3 levels shows good concordance with cone photoreceptor subtype, matching the data for Pias3 levels in cone photoreceptor inner segments that are shown in Figure 1b.

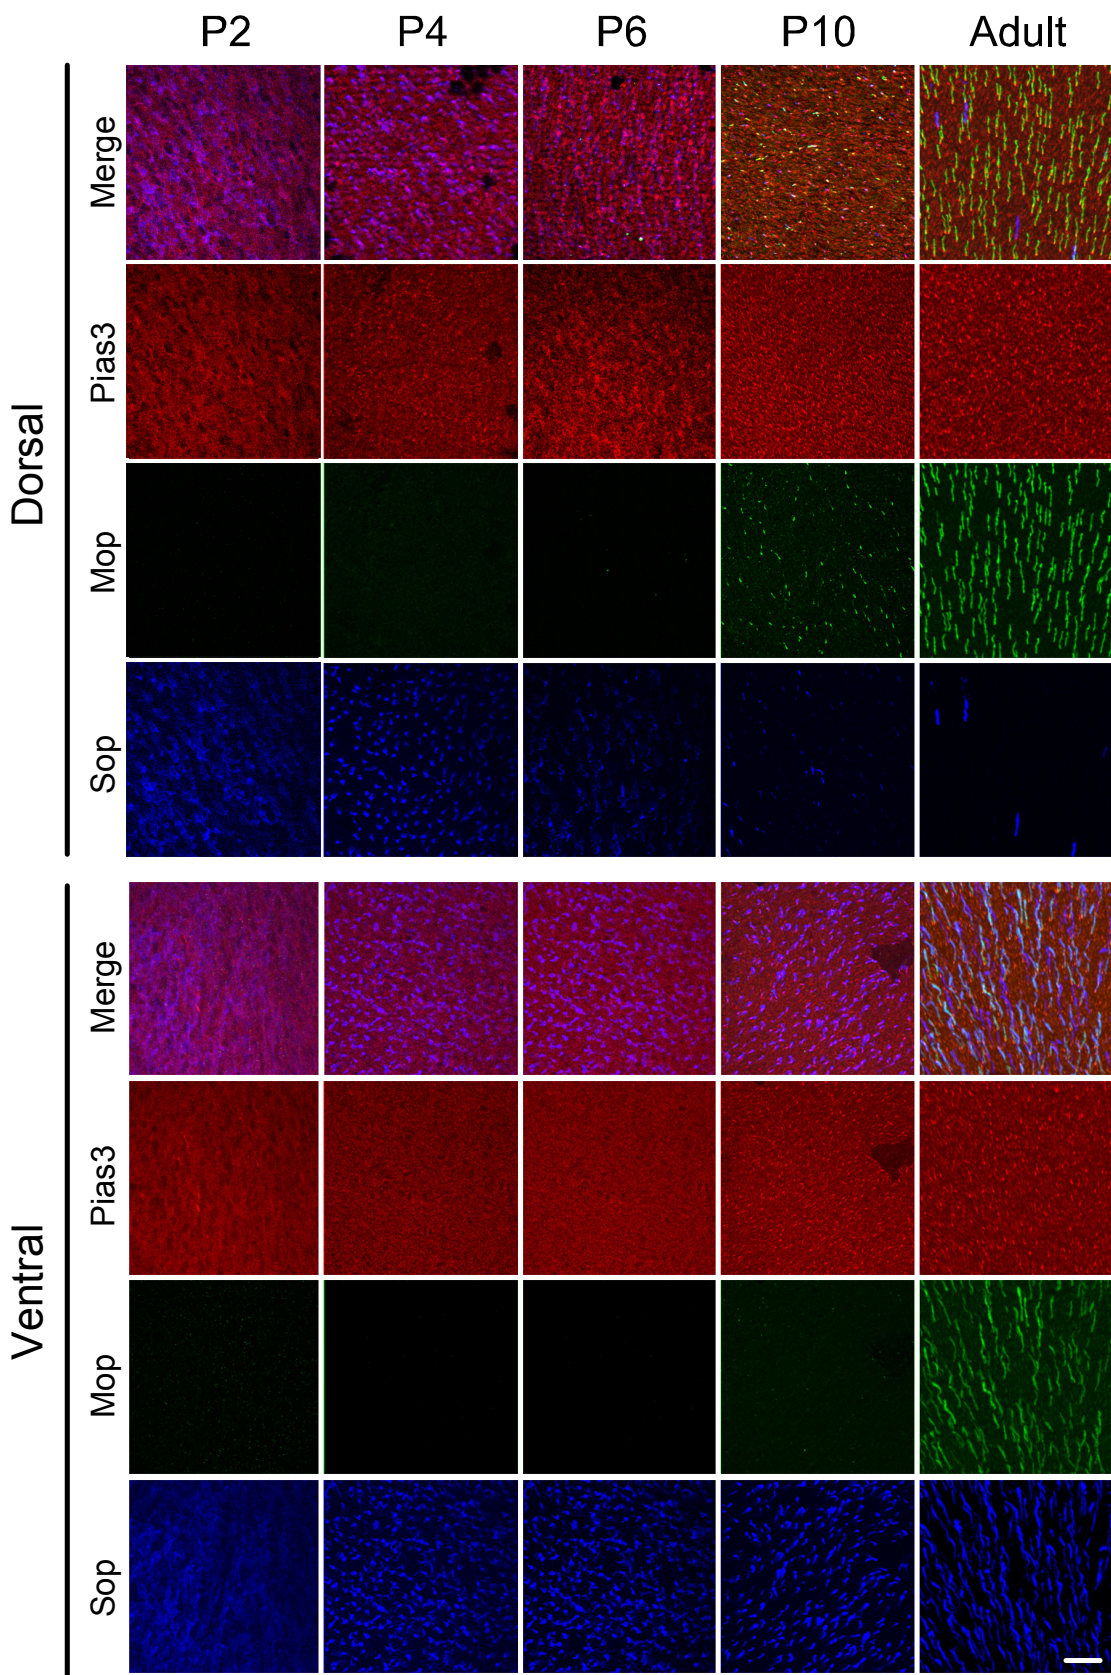

**Supplementary Figure 2.** Developmental expression of Pias3 (red) in dorsal and ventral region of the mouse retina, and co-immunostained with Sop (blue) and Mop (green) antibodies. S-opsin is expressed both in dorsal and ventral region at P2. The selective expression of Pias3 in cone photoreceptors precedes both the downregulation of S-opsin expression and induction of M-opsin expression (P6~P10). In the adult, Pias3 is preferentially expressed in M-opsin expressing cones (see Figure 1). Scale bar: 20  $\mu\text{m}$ .



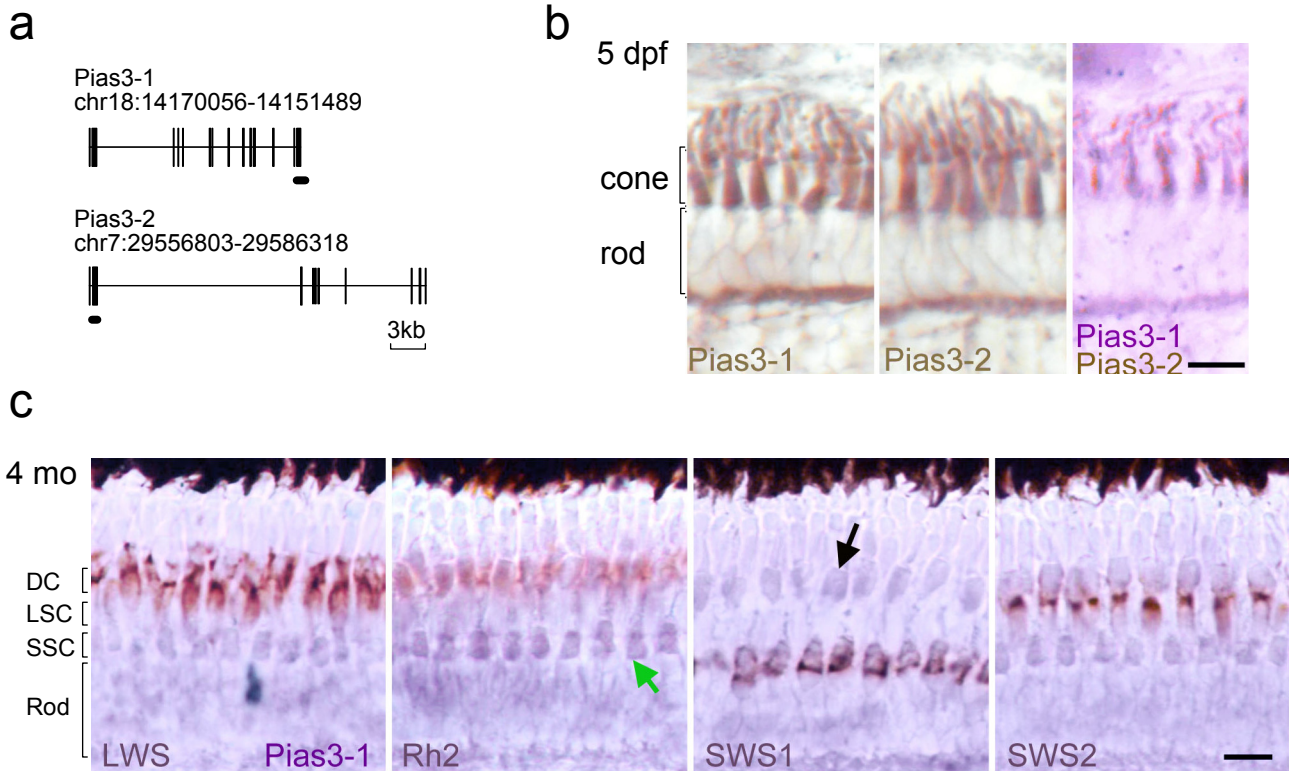

**Supplementary Figure 3.** *Pias3* orthologues are expressed in *LWS*, *Rh2* and *SWS1* cones of zebrafish (a) Genomic structure and location of the two *Pias3* homologues of Zebrafish. (b) Single or two-color chromogenic *in situ* hybridization analysis of *Pias3-1* (brown) and *Pias3-2* (brown) in 5 days post fertilization (5 dpf) zebrafish retina. *Pias3-1* (purple) and *Pias3-2* (brown) are colocalized in cone photoreceptors. (c) Two-color chromogenic *in situ* hybridization of *Pias3-1* (purple) and each cone subtype (*LWS*, *SWS1*, *SWS2*, *Rh2*, shown in brown) in four months post-fertilization zebrafish retinas. The result suggests that *SWS2*-positive long single (LCS) cones do not express this *Pias3* homologue. Black arrow indicates *Pias3-1* expression in *LWS/Rh2*-positive double cones (DC), while green arrow indicates *Pias3-1* expression in *SWS1*-positive short-single cones (SSC) Scale bars: Figures B and C, 5  $\mu$ m.

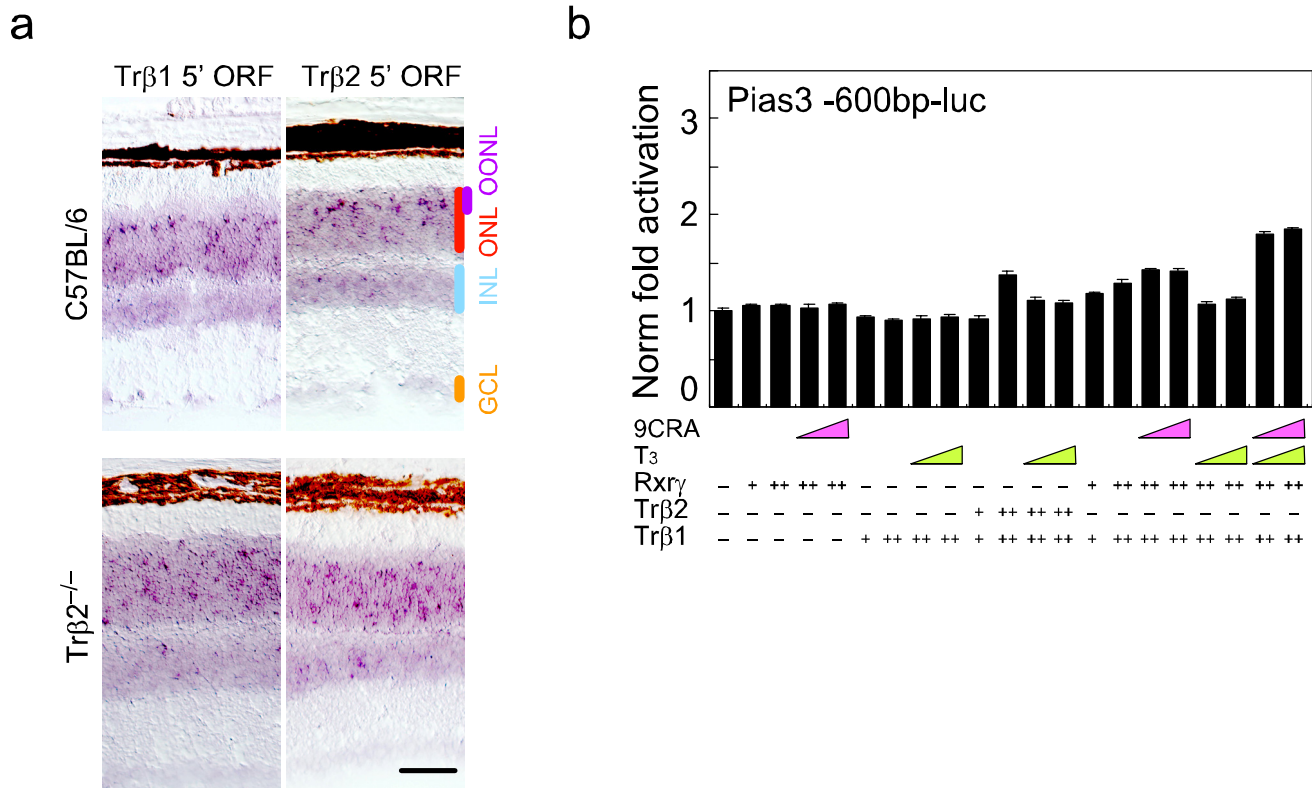

**Supplementary Figure 4.** (a) *In situ* hybridization analysis of *Trβ1* and *Trβ2* mRNA in adult mouse retina. Probes used are generated from divergent sequences at the 5' end of the transcripts, including untranslated and ORF-derived sequence. In C57BL/6, *Trβ1* and *Trβ2* transcripts are primarily observed in outer region of outer nuclear layer (OONL), where cone photoreceptors are located. In the *Trβ2*<sup>-/-</sup> mouse retina, both mRNAs are expressed in a subset of cells scattered throughout the ONL. Since the *in situ* probes hybridization probes used here are complimentary to the first untranslated exon of *Trβ1* and *Trβ2*, we are able to detect expression of this portion of the *Trβ2* transcript in *Trβ2*<sup>-/-</sup> mice, as the first exon is not disrupted by the targeted mutation of *Trβ2*. Scale bar: 50 μm. (b) *Trβ1* and *Rxry* can weakly activate expression of a *Pias3* promoter luciferase reporter construct in the presence of 9-*cis* retinoic acid (9CRA), but do so much less efficiently than *Trβ2* and *Rxry*. Pink and green right triangles represent increasing concentrations of 9CRA (5 μM and 10 μM) and 3,5,3'-triiodothyronine (T<sub>3</sub>, 1 nM and 5 nM), respectively. '+' and '++' represent 15 ng and 30 ng of transfected plasmid, respectively. All data are represented as mean ± s.d. (*n* = 3).



promoters. (b) and (c) Quantitative PCR for the promoters for Mop, Sop, Rhodopsin (Rho), rod transducin (Gnat1), Pias3 and metabotropic glutamate receptor 6 (Grm6) using chromosomal DNA immunoprecipitated with antibodies for Tr $\beta$ 2 and Pias3 (b) and Tr $\beta$ 2 and Sumo1 (c). Input ratio is calculated as in Figure S4A. Data are presented as mean  $\pm$  s.d. ( $n = 3$ ).



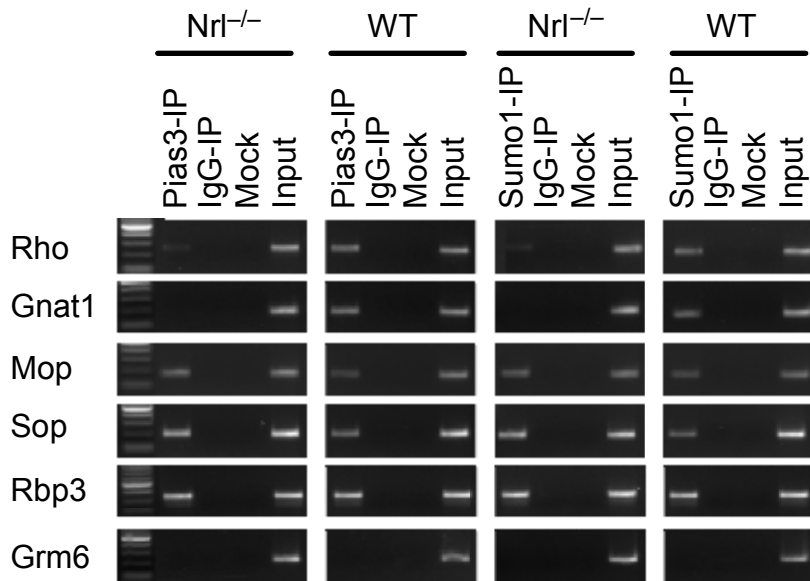

**Supplementary Figure 6.** ChIP assays performed using P14 retinas from C57BL/6 and *Nrl*<sup>-/-</sup> mice. PCR analysis for the promoters for Mop, Sop, Rhodopsin (Rho), rod transducin (Gnat1), Pias3 and metabotropic glutamate receptor 6 (Grm6) using chromosomal DNA immunoprecipitated with antibodies for Pias3 and Sumo1 is shown.

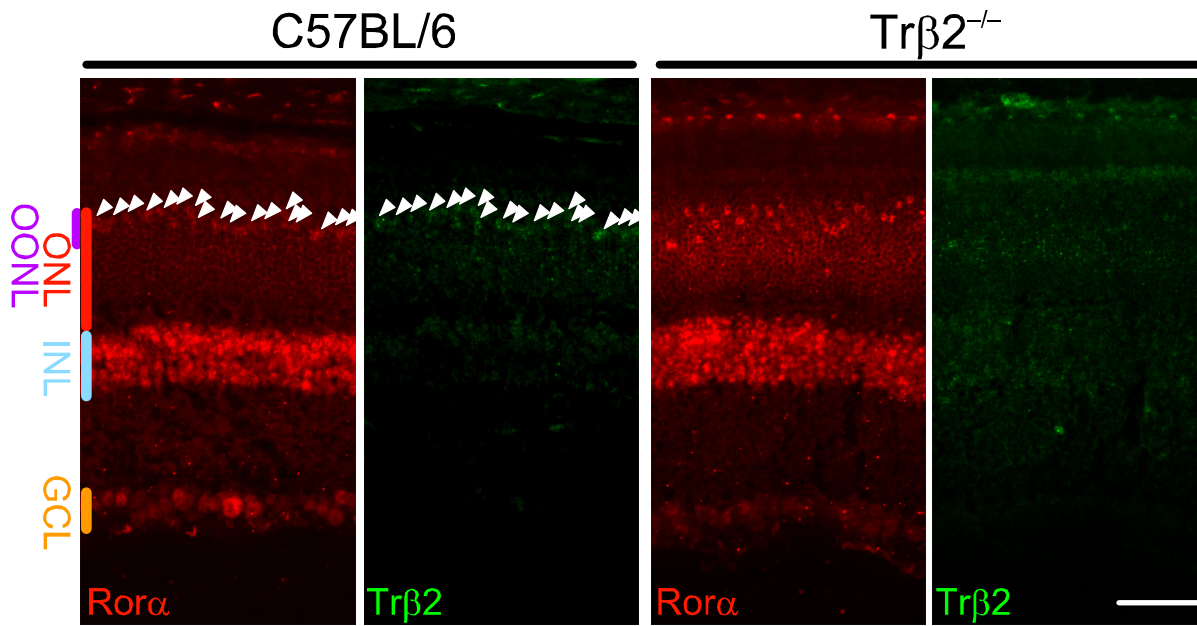

**Supplementary Figure 7.** Section immunohistochemistry of adult C57BL/6 and  $Tr\beta 2^{-/-}$  mouse retinas immunostained with *Rora* (red) and *Trβ2* (green) antibodies. White arrowheads represent cone photoreceptors expressing *Trβ2*, which are immunonegative in  $Tr\beta 2^{-/-}$  animals. Scale bar: 50  $\mu\text{m}$ .

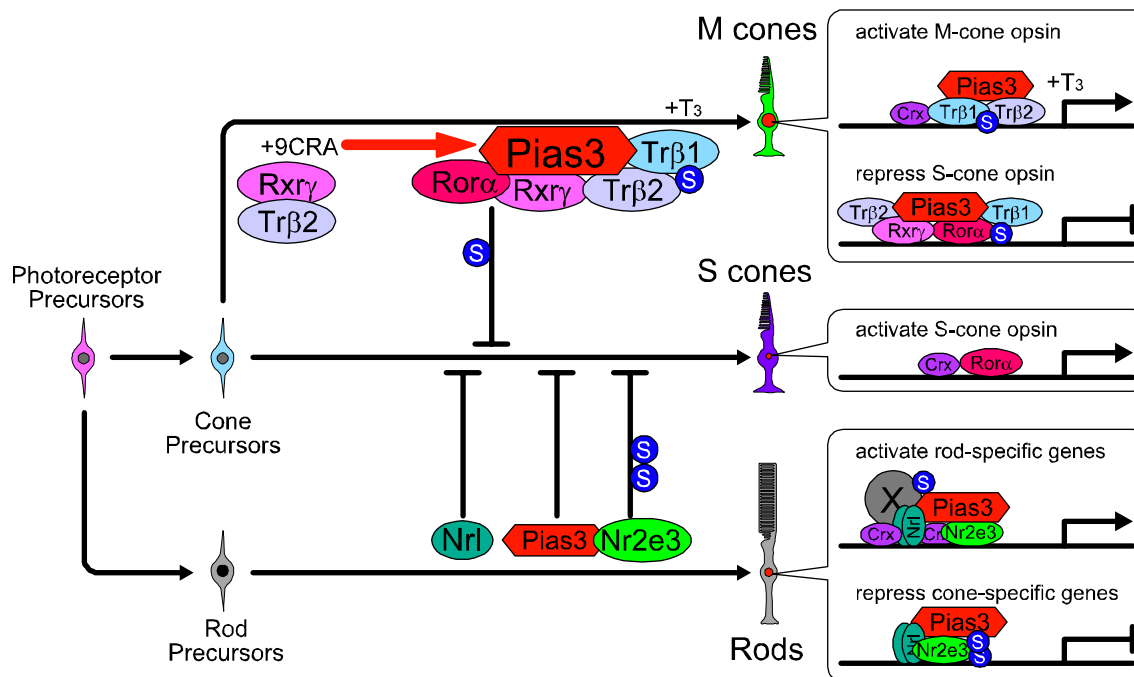

**Supplementary Figure 8.** Model of the mechanism of action of Pias3 in mouse photoreceptor development. “S” indicates SUMOylated proteins, while “X” indicates an unidentified SUMOylated factor present on the promoters of rod-specific genes as suggested in our recent study<sup>22</sup>. In cone precursors, Trβ2 and Rxry activated by 9CRA enriched in dorsal retina activate expression of Pias3. Pias3 expression in cones causes downregulation of S-opsin expression and induction of M-opsin expression by SUMOylation of cone-enriched transcription factors (Rorα, Rxry, Trβ1 and Trβ2). T<sub>3</sub>-bound Trβ1 and/or Trβ2 enhance Pias3-dependent M-opsin expression.

**Supplementary Table 1. DNA constructs used in this study**

| description in the text                                             | construct                                                       | cloned DNA/gene | cloning method                                                  |
|---------------------------------------------------------------------|-----------------------------------------------------------------|-----------------|-----------------------------------------------------------------|
| <b>constructs cloned into pCAGIG(1)</b>                             |                                                                 |                 |                                                                 |
| CAG-GFP                                                             | ires-GFP (pCAGIG)                                               |                 | gift from C. Cepko (Proc Natl Acad Sci U S A. 101:16-22)        |
| CAG-Pias3                                                           | mouse Pias3 (accession no. NM_018812.1)                         |                 | RT-PCR                                                          |
| Pias3 ΔSUMO                                                         | Pias3 mutant in RING domain (C299S, H301A)                      |                 | PCR from myc-tagged Pias3 RING mutant (gift from F. Liu)        |
| CAG-Gam1                                                            | Gam1 (accession no. AC_000014.1:37391-38239)                    |                 | PCR from myc-tagged Gam1 (gift from S. Chiocca)                 |
| <b>constructs cloned into pcDNA3.1/HisC or pcDNA3.1/nV5-DEST(2)</b> |                                                                 |                 |                                                                 |
| Pias3                                                               | mouse Pias3 (accession no. NM_018812.1)                         |                 | RT-PCR                                                          |
| Pias3 ΔSUMO                                                         | Pias3 mutant in RING domain (C299S, H301A)                      |                 | PCR from myc-tagged Pias3 RING mutant (gift from F. Liu)        |
| Rxfy                                                                | human RXRG (accession no. NP_001009598.1)                       |                 | Gateway cloning from Ultimate Human ORF Collection (Invitrogen) |
| Trpβ2                                                               | mouse Trpβ2 (accession no. NP_0333406.1)                        |                 | PCR from Trpβ2 cDNA (gift from D. Forrest)                      |
| Crx                                                                 | bovine Crx                                                      |                 | Hum Mol Genet. 14:747-764                                       |
| Trpβ1                                                               | human THRB (accession no. BC106929.1)                           |                 | Gateway cloning from Ultimate Human ORF Collection (Invitrogen) |
| Rorα                                                                | human RORA (accession no. NM_134262.1)                          |                 | Gateway cloning from Ultimate Human ORF Collection (Invitrogen) |
| Rorα K185R                                                          | RORA K185R mutant                                               |                 | QuikChange XL site-directed mutagenesis Kit (Stratagene)        |
| <b>constructs cloned into pSilencer2.1/Hygro(3)</b>                 |                                                                 |                 |                                                                 |
| U6-Pias3                                                            | Pias3 shRNA (516-532)                                           |                 | Synthetic oligo                                                 |
| U6-control                                                          | Negative control shRNA                                          |                 | Silencer® Negative Control #1 siRNA (Ambion)                    |
| <b>constructs cloned into pGL2/3(4)</b>                             |                                                                 |                 |                                                                 |
| Pias3 -600bp-luc                                                    | mouse Pias3 promoter region (chr3:96,500,554-96,501,097)        |                 | PCR                                                             |
| Mop -250bp-luc                                                      | human M opsin promoter (chrX:153,447,873-153,448,163)           |                 | Hum Mol Genet. 14:747-764                                       |
| Sop -600bp-luc                                                      | human S opsin promoter (chr7:128,415,845-128,416,406)           |                 | gift from D. Forrest (Mol Endocrinol. 20:1728-1741)             |
| <b>constructs cloned into pBluescript KS-(5)</b>                    |                                                                 |                 |                                                                 |
| Pias3-1                                                             | Zebrafish Pias3-1 (chr18:14,151,257-14,151,760)                 |                 | RT-PCR                                                          |
| Pias3-2                                                             | Zebrafish Pias3-2 (chr7:29,557,068-29,557,473)                  |                 | RT-PCR                                                          |
| LWS                                                                 | Zebrafish LWS opsin (accession no. NM_131175: 111-1184)         |                 | RT-PCR                                                          |
| SWS1                                                                | Zebrafish SWS1 opsin (accession no. NM_131319: 62-1072)         |                 | RT-PCR                                                          |
| SWS2                                                                | Zebrafish SWS2 opsin (accession no. NM_131192: 128-1192)        |                 | RT-PCR                                                          |
| Rh2                                                                 | Zebrafish Rh2 opsin (accession no. NM_131253: 68-1117)          |                 | RT-PCR                                                          |
| Trb1                                                                | mouse Trb1 5' region (accession no. NM_00113417.1: 0 bp-469 bp) |                 | PCR                                                             |
| Trb2                                                                | mouse Trb2 5' region (accession no. NM_009380.3: 0 bp-554 bp)   |                 | PCR                                                             |

(1) gift from C. Cepko, (2) Invitrogen (3) Ambion (4) Promega (5) Stratagene

**Supplementary Table 2. PCR primers used for ChIP analysis.**

| Gene   | Forward primer           | Reverse primer         |
|--------|--------------------------|------------------------|
| Aip1   | GGAGCAGGGGAAAGTGGAG      | GGAAGGAGAGAAGAAAGCAGGC |
| Bbs5   | AGCCCCATCAAACCAGTAATG    | CTCCACCAGGTAGTGTGCG    |
| Fscn2  | AAGAAGAGAGACTAAGAACCGTGG | AGAAGCAGTAGCCAATTGCC   |
| Gnat1  | TTCAGCACTCTCCTGCCAGC     | GCCCCAATCCTTCAACTGC    |
| Gnb1   | TCTTTCCTGTCCACCTGG       | TGTGTCCTGCCTGAATGACC   |
| Guca1a | CACACAAGATGCCCCACTCAAG   | GAACCCACAATGCTCTGCC    |
| Guca1b | CCCAGGCTCTTACCCTCATAG    | CCTTAGGCTCCTCTCCTTGG   |
| Pias3  | TGGCGGGACTCTGGGATTTTC    | TAACGACGAGAAGGCGGACC   |
| Rom1   | AGGTAACCCTCCCTGTCCG      | GCTTCTTAGCCTGCCCTTAG   |
